# Supplementary material
Source: HighWire-hosted journal article supplement (https://www.annals.org/content/suppl/2006/02/16/144.4.270)
Supplement: Holty_AT2_144-4-270-DC1-1.pdf [file Holty_AT2_144-4-270-DC1-1.pdf]

**Appendix Table 2. Individual Inhalational Anthrax Case Reports\***

| Case Number (Reference)   | Year | Country       | Age, y | Sex    | Exposure Risk†                 | Prodromal Symptoms‡                                                                                                                             |
|---------------------------|------|---------------|--------|--------|--------------------------------|-------------------------------------------------------------------------------------------------------------------------------------------------|
| 1 (3, 41–45)              | 2001 | US            | 63     | Male   | Presumed bioterrorism          | Malaise, myalgia, fatigue, fever, chills, anorexia, diaphoresis, nausea, emesis                                                                 |
| 2 (3, 41, 42)             | 2001 | US            | 73     | Male   | Presumed bioterrorism          | Fatigue, cough, lethargy, dyspnea, fever, rhinorrhea, diaphoresis, abdominal pain, emesis, conjunctivitis, confusion                            |
| 3 (3, 30, 41, 46–48)      | 2001 | US            | 56     | Male   | Bioterrorism                   | Fever, chills, odynophagia, headache, malaise, cough, dyspnea, pleurisy, myalgia, arthralgia, anorexia, diaphoresis, nausea, emesis, hemoptysis |
| 4 (3, 41, 46–48)          | 2001 | US            | 56     | Male   | Bioterrorism                   | Headache, fever, chills, odynophagia, myalgia, nausea, malaise, diaphoresis, cough, pleurisy, dyspnea, blurred vision, photophobia              |
| 5 (3, 41, 42, 47, 49)     | 2001 | US            | 55     | Male   | Bioterrorism                   | Fever, diaphoresis, myalgia, cough, fatigue, dyspnea, chills, chest pain, nausea, emesis                                                        |
| 6 (3, 41, 42, 47, 49–52)  | 2001 | US            | 47     | Male   | Bioterrorism                   | Cough, nausea, emesis, abdominal colic, syncope, diaphoresis, fatigue, lightheadness, flu-like symptoms, myalgia, chills, dyspnea               |
| 7 (3, 41)                 | 2001 | US            | 59     | Male   | Bioterrorism                   | Diaphoresis, fatigue, myalgia, fever, chills, headache, nausea, emesis, abdominal pain, cough, chest pain                                       |
| 8 (3, 41, 42, 52, 53)     | 2001 | US            | 56     | Female | Bioterrorism                   | Emesis, diarrhea, fever, chills, headache, fatigue, cough, dyspnea, pleurisy                                                                    |
| 9 (3, 41, 42, 53)         | 2001 | US            | 43     | Female | Bioterrorism                   | Fever, chills, cough, chest pain, dyspnea, myalgia, fatigue, nausea, emesis, headache, stuffy head, mild confusion                              |
| 10 (3, 22, 40–42, 54, 55) | 2001 | US            | 61     | Female | Presumed bioterrorism          | Malaise, fatigue, myalgia, chills, chest pain, dyspnea, cough, hemoptysis                                                                       |
| 11 (21, 41, 42, 56, 57)   | 2001 | US            | 94     | Female | Presumed bioterrorism          | Fever, fatigue, myalgia, cough, dyspnea, anorexia, confusion                                                                                    |
| 12 (58, 59)               | 1997 | Turkey        | 64     | Male   | Wool                           | Malaise, fever, headache, abdominal pain, dyspnea                                                                                               |
| 13 (91)                   | 1992 | France        | 33     | Male   | Unknown                        | Myalgia, asthenia, dyspnea, cough, diarrhea                                                                                                     |
| 14 (99)                   | 1986 | Switzerland   | 54     | Female | Unknown                        | Fever, generalized weakness, nausea, back pain                                                                                                  |
| 15 (97, 98)               | 1980 | Switzerland   | 37     | Male   | Textile mill                   | Cough, fever, dyspnea, hematemesis, melena, head cold symptoms                                                                                  |
| 16 (60)                   | 1977 | India         | 63     | Male   | Unknown                        | Cough, fever, dizziness, headache, restlessness, urinary incontinence                                                                           |
| 17 (2, 39, 61, 62)        | 1976 | US            | 32     | Male   | Imported yarn                  | Fever, odynophagia, chest pain, headache, nausea, anorexia                                                                                      |
| 18 (63)                   | 1976 | Great Britain | 53     | Male   | Unknown, bone meal?            | Odynophagia, fever, chest pain, cough                                                                                                           |
| 19 (64)                   | 1975 | Iran          | 16     | Female | Unknown                        | Dyspnea, axilla swelling                                                                                                                        |
| 20 (64)                   | 1975 | Iran          | 34     | Male   | Unknown                        | Cough, dyspnea, hemoptysis                                                                                                                      |
| 21 (100, 101)             | 1972 | Switzerland   | 44     | Male   | Imported wool, carpet factory  | Headache, emesis                                                                                                                                |
| 22 (93–95)                | 1971 | France        | 39     | Male   | Fertilizer factory (bone dust) | Fatigue, insomnia, emesis, diarrhea, confusion                                                                                                  |
| 23 (2, 39, 65)            | 1966 | US            | 46     | Male   | Nearby goat hair factory       | Fatigue, cough, diaphoresis                                                                                                                     |
| 24 (66, 67)               | 1965 | Great Britain | 54     | Male   | Contaminated bone dust         | Backache, abdominal pain, fever                                                                                                                 |

**Appendix Table 2—Continued**

| Clinical Signs at Presentation§                                                                                                             | Treatment                                                                                                              | Medical Complications¶       | Died | Time to Care, d** | Time to Antibiotic Therapy, d†† | Time to Death, d‡‡ |
|---------------------------------------------------------------------------------------------------------------------------------------------|------------------------------------------------------------------------------------------------------------------------|------------------------------|------|-------------------|---------------------------------|--------------------|
| Delirium, febrile, tachycardia, abnormal findings on lung examination, abnormal chest radiogram                                             | Cefotaxime, ceftazidime, gentamicin, metronidazole, doxycycline, ampicillin, trimethoprim-sulfamethoxazole, vancomycin | Meningitis, MV, PE           | Yes  | 4.8               | 4.9                             | 8.4                |
| Febrile, tachycardia, hypotension, abnormal findings on lung examination, abnormal chest radiogram                                          | Azithromycin, cefotaxime, ciprofloxacin                                                                                | PE, PFD                      | No   | 5.9               | 6.0                             | –                  |
| Tachycardia, abnormal findings on lung examination, afebrile, abnormal chest radiogram                                                      | Ciprofloxacin, rifampin, clindamycin                                                                                   | PE, PFD                      | No   | 3.0               | 3.5                             | –                  |
| Tachycardia, abnormal findings on lung examination, afebrile, abnormal chest radiogram                                                      | Ciprofloxacin, rifampin, clindamycin                                                                                   | PE, PFD                      | No   | 4.0               | 4.7                             | –                  |
| Febrile                                                                                                                                     | Levofloxacin                                                                                                           | MV, PE                       | Yes  | 2.0               | 4.8                             | 5.3                |
| Hypothermic, hypotensive, abnormal chest radiogram                                                                                          | Penicillin, ceftriaxone, rifampin, levofloxacin                                                                        | MV, PE                       | Yes  | 4.9               | 5.2                             | 6.3                |
| Febrile, tachycardia, abnormal chest radiogram                                                                                              | Ciprofloxacin, penicillin, rifampin, vancomycin                                                                        | PE, PFD                      | No   | 1.9               | 2.0                             | –                  |
| Febrile, tachycardia, abnormal findings on lung examination, hypoxia, respiratory distress, abnormal chest radiogram                        | Levofloxacin, rifampin, ciprofloxacin, vancomycin                                                                      | PE, PFD                      | No   | 5.0               | 5.2                             | –                  |
| Febrile                                                                                                                                     | Levofloxacin, azithromycin, ciprofloxacin, doxycycline, clindamycin, ceftriaxone                                       | PE, PFD                      | No   | 1.0               | 1.1                             | –                  |
| Hypothermic, tachycardia, tachypnea, hypoxia, abnormal findings on lung examination, abnormal chest radiogram                               | Levofloxacin, rifampin, ciprofloxacin, gentamicin, nafcillin, clindamycin, ceftazidime                                 | MV, PE, PFD                  | Yes  | 3.0               | 3.3                             | 5.6                |
| Febrile, tachycardia, hypotension, abnormal chest radiogram                                                                                 | Ceftazidime, vancomycin, ciprofloxacin, ampicillin-sulbactam, erythromycin, clindamycin                                | MV, PE, PFD                  | Yes  | 2.0               | 4.0                             | 6.9                |
| Comatose, febrile, tachypnea, tachycardia, hypotension, neck swelling, neurologic deficits, abnormal chest radiogram                        | Penicillin, chloramphenicol                                                                                            | Meningitis                   | Yes  | 3.1               | 3.1                             | 3.9                |
| Febrile, hypotension, abnormal findings on lung examination, abnormal chest radiogram                                                       | Penicillin, amoxicillin-clavulanate                                                                                    | PE, PFD                      | Yes  | 3.0               | 3.1                             | 7.1                |
| Comatose, hypothermic, cyanosis, abnormal findings on lung examination, hypotensive, abnormal chest radiogram                               | Amoxicillin, chloramphenicol, flucloxacillin                                                                           | Meningitis, PE, cyanosis, MV | Yes  | 2.0               | 4.4                             | 6.3                |
| Febrile, tachycardia, hypotension, abnormal findings on lung examination, abnormal chest radiogram                                          | Ampicillin, gentamicin, cefamandole, rolitetracycline                                                                  | PE, PFD                      | No   | 6.1               | 6.1                             | –                  |
| Tachycardia, hypotension, delirium, neurologic deficits                                                                                     | Penicillin, chloramphenicol                                                                                            | Meningitis                   | Yes  | 2.0               | 2.2                             | 2.8                |
| Abnormal findings on lung examination, neurologic deficits, tachycardia, abnormal chest radiogram                                           | Penicillin, streptomycin                                                                                               | Meningitis, PE               | Yes  | 5.0               | 5.3                             | 6.2                |
| Abdominal tenderness                                                                                                                        | Ambramycin                                                                                                             | Meningitis, cyanosis, PE     | Yes  | 3.1               | 3.1                             | 3.8                |
| Abnormal findings on lung examination, afebrile, abnormal chest radiogram                                                                   | Penicillin, chloramphenicol                                                                                            | –                            | Yes  | 2.0               | 2.1                             | 5.0                |
| Abnormal findings on lung examination, restlessness, labored breathing, clammy skin, abnormal chest radiogram                               | None                                                                                                                   | Cyanosis, PE, PFD            | Yes  | 3.0               | –                               | 3.8                |
| Febrile, delirium, meningeal signs                                                                                                          | None                                                                                                                   | Meningitis                   | Yes  | 3.0               | –                               | 4.0                |
| Agitated, coma, diaphoretic, tachycardia, neurologic deficits, afebrile, hypotension                                                        | None                                                                                                                   | Meningitis, tracheotomy, PE  | Yes  | 3.5               | –                               | 3.7                |
| Delirium, lethargy, diaphoresis, abnormal findings on lung examination, febrile, tachycardia, neurologic deficits, abnormal chest radiogram | Penicillin, chloramphenicol                                                                                            | Meningitis, PE               | Yes  | 5.3               | 5.4                             | 5.6                |
| Normal findings on lung examination                                                                                                         | None                                                                                                                   | PE                           | Yes  | 0.2               | –                               | 2.3                |

*Continued on following page*

*Appendix Table 2—Continued*

| Case Number (Reference) | Year | Country        | Age, y | Sex    | Exposure Risk†                    | Prodromal Symptoms‡                                                                                                          |
|-------------------------|------|----------------|--------|--------|-----------------------------------|------------------------------------------------------------------------------------------------------------------------------|
| 25 (68)                 | 1965 | Croatia        | 54     | Female | Wool                              | Fever, chills, cough, chest pain, headache, nausea, constipation, emesis, hemoptysis, anorexia, flu-like symptoms, urticaria |
| 26 (69)                 | 1964 | Iran           | 30     | Male   | Farmer                            | Fever, cough, headache, malaise, hemoptysis                                                                                  |
| 27 (102)                | 1963 | France         | 39     | Male   | Unknown                           | Malaise, emesis, fever                                                                                                       |
| 28 (2, 39, 70)          | 1961 | US             | 51     | Female | Goat hair, textile mill           | Weakness, chills, cough, chest pain, myalgia, abdominal pain, fever, back pain, diaphoresis                                  |
| 29 (2, 71)              | 1958 | US             | 53     | Male   | Laboratory                        | Fever, headache, myalgia                                                                                                     |
| 30 (17, 35–39, 72, 73)  | 1957 | US             | 60     | Male   | Goat hair, textile mill           | Headache, cough, back pain, malaise, fever                                                                                   |
| 31 (17, 35–39, 72)      | 1957 | US             | 65     | Female | Goat hair, textile mill           | Cough, chest pain, malaise, fatigue, abdominal pain, chills, fever, cold symptoms                                            |
| 32 (17, 35–39, 72, 73)  | 1957 | US             | 49     | Male   | Goat hair, textile mill           | Cough, chest pain, anorexia, emesis, abdominal pain, fever                                                                   |
| 33 (17, 35–39, 72)      | 1957 | US             | 46     | Male   | Goat hair, textile mill           | Malaise, fever, chills, cough, dyspnea, diaphoresis, cold symptoms                                                           |
| 34 (17, 37–39, 72, 73)  | 1957 | US             | 33     | Male   | Goat hair, textile mill           | Fever, chills, cough, malaise, myalgia, coryza, diaphoresis, chest pain, dyspnea, emesis, dysphagia, odynophagia, anorexia   |
| 35 (2, 39, 74, 75)      | 1957 | US             | 28     | Male   | Nearby tannery and goat hair mill | Dyspnea, cough, anorexia, chest pain, nausea                                                                                 |
| 36 (103)                | 1955 | Russia         | NR     | Female | Unknown                           | Respiratory congestion (catarrh), flu-like symptoms                                                                          |
| 37 (104, 105)           | 1954 | France         | NR     | Female | Horse hair                        | Flu-like symptoms, headache                                                                                                  |
| 38 (106, 107)           | 1954 | Russia         | 13     | Male   | Dust from infected sheep and calf | –                                                                                                                            |
| 39 (76)                 | 1953 | Nairobi        | 30     | Male   | Tannery                           | Headache, hematuria, painful axilla swelling                                                                                 |
| 40 (2, 77)              | 1951 | US             | 37     | Female | Tannery, wool mill dust           | Malaise, fever, leg pain, headache, backache, anorexia, emesis, restlessness                                                 |
| 41 (2, 74)              | 1948 | US             | 50     | Female | Tannery, mill dust                | Cold symptoms, emesis, headache, rhinorrhea                                                                                  |
| 42 (78)                 | 1947 | US             | 46     | Male   | Unknown                           | Cough, malaise, dyspnea, fever, headache, chest pain, hemoptysis                                                             |
| 43 (34)                 | 1946 | US             | 29     | Female | Unknown                           | Headache, upset stomach, dizziness, anorexia                                                                                 |
| 44 (79)                 | 1942 | US             | 42     | Male   | Textile mill                      | Nausea, emesis, dyspnea, fever, chills, chest pain, abdominal pain, back pain, cough                                         |
| 45 (108)                | 1941 | US             | 71     | Male   | Leather factory                   | Fatigue, headache, rhinorrhea, dyspnea, odynophagia                                                                          |
| 46 (109)                | 1929 | Germany        | 17     | Male   | Wool                              | Fever, chills, pleurisy, cough, dyspnea, hemoptysis                                                                          |
| 47 (80)                 | 1928 | US             | 2.5    | Female | Unknown                           | Choking spell, cough, restlessness                                                                                           |
| 48 (110)                | 1928 | Czech Republic | 38     | Male   | Unknown                           | Chest pain, emesis, headache, cough, insomnia, fatigue, anorexia, hoarseness                                                 |

Appendix Table 2—Continued

| Clinical Signs at Presentations§                                                                                                                                                          | Treatment                                       | Medical Complications¶   | Died | Time to Care, d** | Time to Antibiotic Therapy, d†† | Time to Death, d‡‡ |
|-------------------------------------------------------------------------------------------------------------------------------------------------------------------------------------------|-------------------------------------------------|--------------------------|------|-------------------|---------------------------------|--------------------|
| Febrile, tachycardia, abnormal findings on lung examination                                                                                                                               | Ambramycin, rolitetracycline                    | PE, cyanosis             | Yes  | 3.1               | 2.4                             | 5.1                |
| Febrile, stuporous, hypotension, tachycardia, tachypnea, abnormal findings on lung examination, neurologic deficits, meningeal signs, abnormal chest radiogram                            | Penicillin, chloramphenicol, streptomycin       | –                        | Yes  | 5.0               | 5.4                             | 8.2                |
| Febrile, comatose, abnormal findings on lung examination, neurologic deficits, convulsions, meningeal signs                                                                               | Penicillin, tetracycline, streptomycin          | Meningitis, tracheotomy  | Yes  | 7.0               | 7.1                             | 7.6                |
| Abnormal findings on lung examination, afebrile, abnormal chest radiogram                                                                                                                 | None                                            | Cyanosis, PE             | Yes  | 1.0               | –                               | 3.8                |
| Febrile, abnormal chest radiogram                                                                                                                                                         | Tetracycline                                    | Cyanosis, PE             | Yes  | 1.1               | 2.0                             | 6.3                |
| Febrile, tachycardia, hypotension, diaphoresis, respiratory stridor, abnormal findings on lung examination                                                                                | None                                            | Cyanosis, PE             | Yes  | 0.3               | –                               | 2.9                |
| Hypothermic, tachycardia, hypotension, abnormal findings on lung examination, abnormal chest radiogram                                                                                    | Penicillin                                      | Cyanosis, PE             | Yes  | 3.0               | 5.5                             | 5.9                |
| Delirium, febrile, tachypnea, abnormal findings on lung examination                                                                                                                       | Penicillin, streptomycin                        | Meningitis, PE           | Yes  | 4.0               | 4.0                             | 4.8                |
| Febrile, tachycardia, tachypnea, abnormal findings on lung examination, cyanotic, delirium, ulcerated erythematous pharynx or tonsil, injected conjunctiva                                | Penicillin, streptomycin                        | Cyanosis, PE, PFD        | No   | 2.9               | 2.9                             | –                  |
| Febrile, abnormal findings on lung examination, diaphoretic, pharyngeal erythema                                                                                                          | Penicillin                                      | Meningitis, cyanosis, PE | Yes  | 2.3               | 2.5                             | 4.2                |
| Tachycardia, tachypnea, afebrile                                                                                                                                                          | Penicillin                                      | Cyanosis, PE             | Yes  | 7.0               | 7.5                             | 7.6                |
| Prostration, “sepsis”                                                                                                                                                                     | None                                            | –                        | Yes  | 4.6               | –                               | 5.3                |
| –                                                                                                                                                                                         | None                                            | Meningitis               | Yes  | 1.5               | –                               | 1.6                |
| –                                                                                                                                                                                         | None                                            | Meningitis               | Yes  | –                 | –                               | –                  |
| Febrile                                                                                                                                                                                   | Penicillin, anthrax antiserum                   | Meningitis               | Yes  | 4.0               | 4.2                             | 6.3                |
| Comatose, febrile, tachycardia, neurologic deficits, meningeal signs                                                                                                                      | None                                            | Meningitis, PE           | Yes  | 5.0               | –                               | 5.1                |
| Comatose, febrile, hypotension, abnormal findings on lung examination, meningeal signs, cyanosis, tachycardia, neurologic deficits, cold and clammy skin                                  | Penicillin                                      | Meningitis, cyanosis, PE | Yes  | 2.9               | 2.9                             | 3.2                |
| Tachycardia, tachypnea, hypotension, diaphoretic, abnormal findings on lung examination, cyanosis, neurologic deficits, delirium                                                          | None                                            | Cyanosis, PE             | Yes  | 2.9               | –                               | 3.0                |
| Comatose, febrile, tachypnea, tachycardia, neurologic deficits, convulsions, abnormal findings on lung examination, meningeal signs                                                       | Chlortetracycline                               | Meningitis, PE           | Yes  | 5.3               | 5.4                             | 6.6                |
| Febrile, cyanosis, tachycardia, tachypnea, hypotension, abnormal findings on lung examination, diaphoretic, abnormal chest radiogram                                                      | Sulfathiazole, sulfadiazine                     | Cyanosis, PE             | Yes  | 0.3               | –§§                             | 4.6                |
| Febrile, tachycardia, neck swelling, nasal obstruction, nasal turbinate edema, respiratory distress                                                                                       | Sulfathiazole, anthrax antiserum, sulfanilamide | PE                       | Yes  | 2.5               | 4.0                             | 6.4                |
| Febrile, tachycardia, abnormal findings on lung examination                                                                                                                               | Anthrax antiserum                               | –                        | No   | 3.0               | 3.5                             | –                  |
| Febrile, abnormal findings on lung examination, neurologic deficits, cyanosis, pharyngeal erythema and edema, abdominal distention, mottled skin, erythematous bulging tympanic membranes | Anthrax antiserum, horse antiserum              | PE, PFD, cyanosis        | No   | 2.0               | 6.0                             | –                  |
| Febrile, abnormal findings on lung examination, neurologic deficits, delirium, cyanosis, tachycardia, tachypnea                                                                           | None                                            | Meningitis, cyanosis     | Yes  | 4.9               | –                               | 5.3                |

Continued on following page

Appendix Table 2—Continued

| Case Number (Reference) | Year | Country       | Age, y | Sex    | Exposure Risk†       | Prodromal Symptoms‡                                                                                                     |
|-------------------------|------|---------------|--------|--------|----------------------|-------------------------------------------------------------------------------------------------------------------------|
| 49 (81)                 | 1924 | US            | 45     | Female | Unknown              | Dyspnea, nervousness, cough, indigestion                                                                                |
| 50 (111)                | 1924 | Germany       | 34     | Male   | Animal fur and skins | "Not feeling well"                                                                                                      |
| 51 (82)                 | 1920 | US            | 36     | Male   | Tannery              | Odynophagia, chest pain, cough, dyspnea                                                                                 |
| 52 (83)                 | 1917 | US            | 50     | Male   | Hides, bone dust     | Headache, "taken ill"                                                                                                   |
| 53 (84)                 | 1917 | Uganda        | NR     | Male   | Unknown              | Cough, chills, chest pain                                                                                               |
| 54 (85)                 | 1916 | Great Britain | 22     | Male   | Unknown              | Chills, chest pain, headache, emesis                                                                                    |
| 55 (111)                | 1914 | Germany       | 59     | Male   | Unknown              | Headache, nausea, fatigue, malaise                                                                                      |
| 56 (112, 113)           | 1914 | Germany       | NR     | Male   | Unknown              | Headache, malaise, leg weakness                                                                                         |
| 57 (114, 115)           | 1913 | Russia        | 42     | Male   | Laboratory           | Felt "ill", myalgia, fatigue                                                                                            |
| 58 (111)                | 1910 | Germany       | 35     | Male   | Unknown              | Cough, dyspnea, malaise                                                                                                 |
| 59 (116)                | 1910 | Germany       | NR     | Male   | Unknown              | Fever                                                                                                                   |
| 60 (86)                 | 1909 | Great Britain | 42     | Male   | Unknown              | Cold symptoms, emesis, chills, cough, wheezing, insomnia, dyspnea, headache, abdominal pain, pleurisy, malaise, syncope |
| 61 (96)                 | 1909 | Switzerland   | 26     | Male   | Veterinarian         | Chest pain, diaphoresis, chills, cough, dyspnea, headache                                                               |
| 62 (92)                 | 1908 | Germany       | 31     | Male   | Textile mill         | Chest pain, dyspnea, fatigue, abdominal pain, chills                                                                    |
| 63 (117)                | 1908 | Russia        | 56     | Female | Infected wool        | Headache, fever, cough, fatigue                                                                                         |
| 64 (117)                | 1908 | Russia        | 56     | Female | Infected wool        | Chills, cough, chest pain, fever, fatigue, dyspnea, headache                                                            |
| 65 (117)                | 1908 | Russia        | 29     | Female | Infected wool        | Headache, abdominal pain, emesis, fever, fatigue, cough, dyspnea, chest pain                                            |
| 66 (117)                | 1908 | Russia        | NR     | Female | Infected wool        | Headache, chills, cough, fever, fatigue, dyspnea, chest pain                                                            |
| 67 (117)                | 1908 | Russia        | 42     | Male   | Infected wool        | Fever, fatigue, dyspnea, chest pain, headache                                                                           |
| 68 (117)                | 1908 | Russia        | NR     | Male   | Infected wool        | Headache, cough, stabbing flank pain, fever, fatigue, dyspnea, chest pain                                               |
| 69 (87)                 | 1907 | US            | 28     | Male   | Hair and wool mill   | Malaise, myalgia, headache, emesis, fever, cough, dyspnea, abdominal pain                                               |
| 70 (88)                 | 1907 | Great Britain | 32     | Male   | Wool mill            | Headache, abdominal pain                                                                                                |
| 71 (118)                | 1907 | Germany       | 37     | Female | Horsehair            | Fever, laryngitis, cough, hemoptysis, dyspnea                                                                           |
| 72 (89)                 | 1906 | Great Britain | 53     | Male   | Wool mill            | Cough, dyspnea, shivering, nausea, headache, vertigo, malaise, emesis                                                   |
| 73 (31–33)              | 1905 | Great Britain | 36     | Male   | Unknown              | Headache, dizziness, anorexia                                                                                           |
| 74 (119)                | 1904 | Germany       | 20     | Male   | Horsehair            | Fever, exhaustion, neck swelling                                                                                        |
| 75 (120)                | 1904 | Germany       | 42     | Male   | Dock worker          | Chest pain, chills, exhaustion                                                                                          |
| 76 (121, 122)           | 1902 | Germany       | 54     | Female | Animal hides         | Chest pain, dyspnea, malaise, arthralgias                                                                               |
| 77 (123)                | 1902 | Germany       | 42     | Male   | Unknown              | –                                                                                                                       |
| 78 (90)                 | 1901 | Great Britain | 33     | Male   | Wool mill            | Chills, myalgia, nausea                                                                                                 |
| 79 (124, 125)           | 1901 | Poland        | 16     | Female | Unknown              | –                                                                                                                       |
| 80 (126, 127)           | 1900 | Germany       | 32     | Male   | Unknown              | Chills, fever, myalgia                                                                                                  |
| 81 (128)                | 1900 | Austria       | NR     | Male   | Unknown              | –                                                                                                                       |
| 82 (129, 130)           | 1900 | Germany       | 35     | Male   | Unknown              | –                                                                                                                       |

\* Three patients (31–33, 91, 92) who received a diagnosis of gastrointestinal anthrax by the treating physicians met our inclusion criteria. The first patient initially received a diagnosis of community-acquired pneumonia and had pleural effusions with mediastinal lymphadenopathy but no ascites (91). Although this patient had diarrhea, this patient had no clear history of eating contaminated meat and gastrointestinal symptoms were similar to those in the US 2001 inhalational cases. The second patient had no gastrointestinal symptoms except for mild abdominal tenderness and was found to have pleural effusions with hemorrhagic mediastinitis and mediastinal lymphadenopathy at autopsy (31–33). The treating physicians could not exclude an inhalational port of entry. The final patient reported chest pain with dyspnea, and the treating physicians suspected either an inhalational or gastrointestinal source of infection (92). Two additional case-patients who met our inclusion criteria (34, 93–95) received a diagnosis of primary anthrax meningoenzephalitis. In 1 case, the treating physicians suspected an inhalational port of entry (transethmoidal), and this patient had large bilateral pleural effusions at autopsy (93–95). The second case had lung disease at autopsy and was included in previous reviews of inhalational anthrax (34). Excluding these 5 patients did not statistically significantly affect the Cox proportional hazards analysis. MV = mechanical ventilation; NR = not reported; PE = pleural effusion; PFD = pleural fluid drainage; US = United States.

† Exposure to anthrax-contaminated mail in 4 of 11 US 2001 cases is unproven (e.g., presumed bioterrorism).

‡ A dash indicates not reported or inability to determine.

§ A dash indicates no additional findings compared with prodromal symptoms column, patient did not present to health care provider before death, not reported, or inability to determine.

|| Antibiotics or anthrax antiserum. Of the 37 patients who received an anthrax-susceptible antibiotic or anthrax antiserum, 24 were given penicillins, 10 were given fluoroquinolones, 7 were given chloramphenicol, 7 were given tetracyclines, 6 were given anthrax antiserum, 6 were given rifampin, 5 were given cephalosporins, 5 were given clindamycin, 4 were given vancomycin, 3 were given macrolides, and 3 were given aminoglycosides.

¶ A dash represents cases either not seen before death or no additional signs or symptoms noted in case report at presentation.

\*\* Time from symptom onset to initial health care contact. A dash represents cases not seen before death or inability to calculate.

†† Time from symptom onset to antibiotic (or antiserum) therapy. A dash represents no treatment given or inability to calculate.

‡‡ Time from symptom onset to death. A dash represents no death or inability to calculate.

§§ Sulfa-based antibiotics have little or no efficacy for treating anthrax (see text).

||| Mild cyanosis without respiratory distress.

Appendix Table 2—Continued

| Clinical Signs at Presentations§                                                             | Treatment         | Medical Complications¶      | Died | Time to Care, d** | Time to Antibiotic Therapy, d†† | Time to Death, d‡‡ |
|----------------------------------------------------------------------------------------------|-------------------|-----------------------------|------|-------------------|---------------------------------|--------------------|
| Fever, tachycardia, tachypnea                                                                | None              | –                           | Yes  | –                 | –                               | –                  |
| Delirium                                                                                     | None              | PE                          | Yes  | 2.6               | –                               | 2.7                |
| Febrile, abnormal findings on lung examination, diaphoretic, cyanosis, pharyngeal congestion | Anthrax antiserum | Cyanosis                    | Yes  | 7.0               | 8.3                             | 10.0               |
| Moribund                                                                                     | None              | –                           | Yes  | 3.9               | –                               | 4.0                |
| Febrile, tachycardia, tachypnea, abnormal findings on lung examination                       | None              | –                           | Yes  | 4.1               | –                               | 10.3               |
| Comatose                                                                                     | None              | Meningitis, PE              | Yes  | 1.7               | –                               | 2.4                |
| Comatose, febrile, tachycardia                                                               | None              | PE, meningitis              | Yes  | 1.0               | –                               | 1.6                |
| Febrile, neurologic deficits, delirium                                                       | None              | Meningitis                  | Yes  | 1.3               | –                               | 1.5                |
| Afebrile, tachycardia, orthostatic dizziness                                                 | None              | Cyanosis                    | Yes  | 3.5               | –                               | 3.9                |
| Cyanosis, tachycardia, afebrile, abnormal findings on lung examination                       | None              | Cyanosis, PE, meningitis    | Yes  | 2.7               | –                               | 3.4                |
| Abnormal findings on lung examination                                                        | None              | PE                          | Yes  | –                 | –                               | –                  |
| Hypothermic, hypotensive, abnormal findings on lung examination                              | None              | PE                          | Yes  | 4.1               | –                               | 4.3                |
| Febrile, abnormal findings on lung examination, tachycardia, slight cyanosis‡‡               | None              | Cyanosis‡‡                  | No   | 29.3              | 40.1                            | –                  |
| –                                                                                            | None              | PE                          | Yes  | 4.4               | –                               | 5.0                |
| –                                                                                            | None              | –                           | Yes  | –                 | –                               | 5.0                |
| Wheezing, afebrile, cyanosis, delirium, weak pulse                                           | None              | Cyanosis                    | Yes  | 2.0               | –                               | 3.0                |
| –                                                                                            | None              | –                           | Yes  | –                 | –                               | 2.1                |
| –                                                                                            | None              | –                           | Yes  | –                 | –                               | 2.0                |
| –                                                                                            | None              | –                           | Yes  | –                 | –                               | 3.0                |
| Cardiovascular collapse                                                                      | None              | –                           | Yes  | –                 | –                               | 4.0                |
| Febrile, tachycardia, abnormal findings on lung examination, diaphoresis                     | None              | PE, PFD                     | Yes  | 7.0               | –                               | 7.2                |
| –                                                                                            | None              | –                           | Yes  | 8.0               | –                               | 8.0                |
| Laryngeal obstruction                                                                        | None              | Meningitis, PE, tracheotomy | Yes  | 3.0               | –                               | 3.2                |
| Febrile, abnormal findings on lung examination, tachypnea                                    | Anthrax antiserum | Cyanosis, PE, PFD           | No   | 2.5               | 3.0                             | –                  |
| Delirium, afebrile, neurologic deficits, abdominal tenderness                                | None              | Meningitis, PE              | Yes  | 0.8               | –                               | 1.5                |
| Febrile, delirium                                                                            | None              | PE                          | Yes  | 8.1               | –                               | 8.6                |
| Febrile, tachycardia, cyanosis, abnormal findings on lung examination                        | None              | Cyanosis, PE                | Yes  | 4.0               | –                               | 5.0                |
| Tachycardia, cyanosis, abnormal findings on lung examination, hypothermic                    | None              | PE, cyanosis                | Yes  | 2.3               | –                               | 2.6                |
| –                                                                                            | None              | PE, meningitis              | Yes  | –                 | –                               | –                  |
| Febrile, tachycardia                                                                         | None              | Meningitis, PE              | Yes  | 1.1               | –                               | 4.5                |
| “In agony”                                                                                   | None              | Meningitis, PE              | Yes  | –                 | –                               | –                  |
| Unconsciousness, convulsions, trismus, opisthotonos                                          | None              | Meningitis, PE              | Yes  | 2.0               | –                               | 2.4                |
| Unconsciousness, cyanosis, neurologic deficits                                               | None              | Cyanosis, PE, meningitis    | Yes  | –                 | –                               | –                  |
| Delirium, cyanosis, hypothermic                                                              | None              | Cyanosis                    | Yes  | 5.0               | –                               | 6.1                |
